1 **Gut segments outweigh the diet in shaping the intestinal microbiome composition in**  
2 **grass carp *Ctenopharyngodon idellus***

3 Wenwen Feng,<sup>a,b#</sup> Jing Zhang,<sup>a,b #</sup> Ivan Jakovlić,<sup>c</sup> Fan Xiong,<sup>a,b</sup> Shangong Wu,<sup>a,b \*</sup> Hong  
4 Zou,<sup>a,b</sup> Wenxiang Li,<sup>a,b</sup> Ming Li,<sup>a,b</sup> Guitang Wang<sup>a,b</sup>

5 <sup>a</sup>Key Laboratory of Aquaculture Disease Control, Ministry of Agriculture, and State Key  
6 Laboratory of Freshwater Ecology and Biotechnology, Institute of Hydrobiology, Chinese  
7 Academy of Sciences, Wuhan 430072, China;

8 <sup>b</sup>University of Chinese Academy of Sciences, Beijing 100049, China;

9 <sup>c</sup>Bio-Transduction Lab, Wuhan, 430072, China.

10

11 \*Correspondence:

12 Shangong Wu, Fax: 86-027-68780123, E-mail: [wusgz@ihb.ac.cn](mailto:wusgz@ihb.ac.cn).

13

14 #These authors contributed equally to this work.

15

16 **Running title:** Gut segments outweigh diet for gut microbiome

17

18 **KEYWORDS:** gut microbiome, diet, midgut, hindgut, analysis of variance

19

20 **ABSTRACT**

21 Although dynamics of the complex microbial ecosystem populating the gastrointestinal tract  
22 of animals has profound and multifaceted impacts on host's metabolism and health, it remains  
23 unclear whether it is the intrinsic or extrinsic factors that play a more dominant role in  
24 mediating variations in the composition of intestinal microbiota. To address this, two  
25 strikingly different diets were studied: a high-protein, low-fiber formula feed (FF), and  
26 low-protein, high-fiber Sudan grass (SG). After a 16-week feeding trial on a herbivorous fish,  
27 grass carp, microbial profiles of midgut (M) and hindgut (H) segments of both groups were  
28 compared. Bacteroidetes were more abundant in the hindgut ( $T=-7.246$ ,  $p<0.001$ ), and  
29 Proteobacteria in the midgut ( $T=4.383$ ,  $p<0.001$ ). Fusobacteria were more abundant in the FF  
30 group (compared to the SG group,  $T=2.927$ ,  $p<0.001$ ). Bacterial composition was different  
31 ( $p<0.05$ ) between the midguts of formula feed (M-FF) and Sudan grass (M-SG) groups, but  
32 not between the hindguts of two groups (H-FF and H-SG;  $p=0.269$ ). PerMANOVA and VPA  
33 indicated that the gut segment contributed 19.8% ( $p<0.001$ ) and 28% ( $p<0.001$ ) of the  
34 variation of microbial communities, whereas diet contributed only 8.0% ( $p<0.001$ ) and 14%  
35 ( $p<0.001$ ), respectively. Overall, results suggest that intestinal compartments are a stronger  
36 determinant than diet in shaping the intestinal microbiota. Specifically, whereas diet has a  
37 strong impact on the microbiome composition in proximal gut compartments, this impact is  
38 much less pronounced distally, which is likely to be a reflection of a limited ability of some  
39 microbial taxa to thrive in the anoxic environment in distal segments.

40

41 **IMPORTANCE**

42 The impact of compositional dynamics of gut microbiota on host's metabolism and health is  
43 so profound that the traditional idea of biological individual is increasingly replaced with  
44 "holobiont", comprising both the host and its microbiome. Composition of gut microbiota is  
45 strongly influenced by extrinsic (such as diet) and intrinsic (such as gut compartment) factors.  
46 Despite ample scientific attention both of these factors have received individually, their  
47 relative contributions in mediating the dynamics of the microbiome remain unknown. Given  
48 the importance of this issue, we set out to disentangle their individual contributions in a  
49 herbivorous fish, grass carp. We found that intestinal compartments are a stronger determinant  
50 than diet in shaping the intestinal microbiota. Whereas the impact of diet is strongly  
51 pronounced in proximal gut compartments, it appears that limited ability of some microbial  
52 taxa to thrive in the anoxic environment in distal segments strongly reduces the impact of diet  
53 distally.

54

55 Gastrointestinal tract of animals harbors an extremely diverse and complex microbial  
56 ecosystem (1-3). In the course of coevolution of gut microbiota and hosts, gut microbial  
57 community has become an integral component of the host (4, 5). Apart from contributing to  
58 the harvest of dietary nutrients that would otherwise be inaccessible to the host (6, 7) and to  
59 the education of the host's immune system (8, 9), they also have profound impacts on host's  
60 development and behavior (10, 11).

61 Although dominant members of gut microbiota are generally relatively constant (12),  
62 their overall composition is very variable, and strongly influenced by extrinsic and intrinsic  
63 factors (4, 13, 14), resulting in notable variability among individuals (3). Regarding the  
64 extrinsic factors, diet is known to be a major determinant of the microbial community  
65 composition in both terrestrial (15) and aquatic vertebrates (16). Among the intrinsic factors  
66 (e.g. gut physiology, host's phylogeny or genotype), gut segments are a strong predictor of the  
67 composition of intestinal microbial communities in terrestrial mammals (4, 17, 18). However,  
68 it still remains unclear whether it is the host's gut segment or dietary intake that plays a more  
69 dominant role in mediating variations in the composition of intestinal microbiota.

70 Characterization of the intestinal microbiota and their ecological function is relatively  
71 advanced in humans and model mammals (19, 20), but less well understood in fish (3).  
72 Intestinal microbiota of fish are believed to be less complex and less numerous than those of  
73 terrestrial vertebrates (9). Due to the tremendous importance of herbivorous grass carp  
74 (*Ctenopharyngodon idellus*) for the freshwater aquaculture and nearly global distribution (21),  
75 its intestinal microbiome has been studied extensively in recent years (3, 22, 23).

76 Proteobacteria, Firmicutes, Bacteroides, Actinobacteria, and Fusobacteria are dominant in its  
77 intestine (23-25). Further investigations indicate that the intestinal microbiome of grass carp  
78 is likely to play an indispensable role in nutrient (especially polysaccharide) turnover and  
79 fermentation of the host (16, 26). Therefore, maintaining homeostasis of intestinal microbiota  
80 is likely to be essential for health and survival of grass carp..

81 The intestinal tract of grass carp is a simple coiled tube with eight convolutions, divided  
82 into three different segments according to its anatomical structure: foregut, midgut and  
83 hindgut (27). Theoretically, physiological functions should be distinct in different intestinal  
84 regions: foregut is believed to be responsible for the absorption of lipids and hindgut for  
85 pinocytotic uptake of macromolecules, including proteins (28, 29). However, most studies of  
86 intestinal microbiota in grass carp focused on the extrinsic factors, such as environment (3),  
87 geolocation (24), host's diet (3, 30) and dietary supplementation application (31, 32), whereas  
88 studies of the roles of intrinsic factors, including the gut compartments, in shaping the  
89 intestinal microbiota in fish remain absent.

90 As diet is believed to be the most important force shaping the gut bacterial community in  
91 fish as well as other animals (33-36), we hypothesized that diet should outweigh the intestinal  
92 segments in shaping the composition of microbial populations in grass carp. To achieve this,  
93 we used two very different diets: formula feed (high-protein, low-fiber) and Sudan grass  
94 (high-fiber, low-protein), and sampled microbial populations of midguts and hindguts of both  
95 diet groups after the feeding experiment. Following this, we compared the microbial profiles  
96 of midgut and hindgut of both diet groups, and statistically tested the relative impacts of

97 dietary intake and different gut segments on shaping the gut microbiota in the midgut and  
98 hindgut of grass carp. Therefore, the objectives of this work were two-fold: to infer  
99 differences in the microbial taxonomic composition among different intestinal compartments  
100 in grass carp, and to contribute to the understanding of relative contributions of diet and gut  
101 physiology on the microbial population structure in animals in general.

## 102 **RESULTS**

### 103 **Bacterial community diversity**

104 Community richness and diversity varied among gut segments and different diets (Table 1).  
105 All four richness and diversity indices were significantly higher in the midgut of both diet  
106 groups: M-FF (midgut-formula feed)>H-FF (hindgut-FF) ( $T_{\text{chao1}}=4.954$ ,  $p<0.01$ ;  $T_{\text{ACE}}=4.850$ ,  
107  $P<0.01$ ;  $T_{\text{shannon}}=4.938$ ,  $P<0.01$ ;  $T_{\text{simpson}}=2.326$ ,  $p<0.05$ ), and M-SG (midgut-Sudan  
108 grass)>H-SG ( $T_{\text{chao1}}=3.393$ ,  $p<0.01$ ;  $T_{\text{ACE}}=3.370$ ,  $P<0.01$ ;  $T_{\text{shannon}}=5.379$ ,  $P<0.01$ ;  
109  $T_{\text{simpson}}=5.136$ ,  $p<0.01$ ). When considering each diet independently, community richness of  
110 the FF group was significantly higher than that of the SG group ( $T_{\text{chao1}}=3.408$ ,  $p<0.01$ ;  
111  $T_{\text{ACE}}=3.582$ ,  $p<0.01$ ). Nevertheless, community diversity was not significantly different  
112 between FF and SG groups ( $T_{\text{shannon}}=1.908$ ,  $P=0.06$ ;  $T_{\text{simpson}}=0.841$ ,  $p=0.403$ ). The highest  
113 community richness and diversity indices were found in the M-FF group  
114 ( $\text{Chao1}=1351.30\pm345.69$ ,  $\text{ACE}=1413.41\pm338.80$ ,  $\text{Shannon}=6.66\pm2.03$ , and  
115  $\text{Simpson}=0.91\pm0.16$ ), while the lowest were found in the H-SG group ( $\text{Chao1}=527.37\pm413.70$ ,  
116  $\text{ACE}=533.72\pm452.78$ ,  $\text{Shannon}=3.45\pm1.38$ , and  $\text{Simpson}=0.76\pm0.09$ ).

### 117 **Bacterial community composition**

118 Using the diet+segment grouping, at the phylum level, Proteobacteria (46.63±19.7%),  
119 Firmicutes (23.52±19.47%), Fusobacteria (11.02±21.77%), Planctomycetes (7.70±8.70%),  
120 and Chloroflexi (3.28±3.34%) were dominant in the two midgut groups of samples (M-FF  
121 and M-SG; Figure 1). However, Bacteroidetes (29.79±24.22%), Proteobacteria  
122 (25.38%±21.40%), Firmicutes (21.52±12.76%), Fusobacteria (18.15%±21.29%) and  
123 Tenericutes (3.53±9.23%) were dominant in the two hindgut groups of samples (H-FF and  
124 H-SG; Figure 1). At the intestinal segment level, Bacteroidetes were significantly more  
125 abundant in the H group (T=-7.246, p<0.001), while Proteobacteria were more abundant in  
126 the M group (T=4.383, p<0.001). At the diet level, the dominant phyla in the FF group were  
127 Proteobacteria (33.56±19.02%), Fusobacteria (21.69±26.49%), Firmicutes (16.74±11.29%),  
128 Bacteroidetes (10.23± 17.77%), Planctomycetes (5.89±9.12%), and Tenericutes (4.83±9.38%),  
129 and dominant phyla in the SG group were Proteobacteria (38.46±26.54%), Firmicutes  
130 (28.30±18.67%), Bacteroidetes (20.10±25.71%), Fusobacteria (7.48±12.15%),  
131 Planctomycetes (2.17±3.71%), and Actinobacteria (1.12±1.45%). Statistical analysis indicated  
132 that Fusobacteria were significantly more abundant in the FF group than in the SG group  
133 (T=2.927, p<0.001). Bacteroidetes were more abundant in SG group than in FF group, but the  
134 difference was slightly above the selected statistical significance threshold (p=0.063).

135 At the genus-level, the top ten most abundant genera differed among the four main  
136 sample groups (M and H, FF and SG; Table S1). On average, *Bacteroides* species were more  
137 abundant (P=0.076) in SG group (17.38±22.55%) than in FF group (9.05±16.17%).  
138 *Cetobacterium* were significantly higher (T=2.672, P<0.05) in FF group (18.53±25.83%) than

139 in SG group ( $5.89 \pm 11.75\%$ ).

140 More than 700 bacterial taxa (genus or higher taxonomic level) significantly different (in  
141 terms of abundance) between the M-FF/H-FF and M-SG/H-SG group pairs were identified  
142 using Lefse with the LDA score value threshold set at 2.0 (Figures S1 and S2). In the FF  
143 group, Bacteroidetes (mostly Bacteroidia and *Bacteroides*), Erysipelotrichi and  
144 Aeromonadales (mostly Aeromonadaceae) were the most enriched taxa in the hindgut,  
145 whereas Desulfobacteria, Planctomycetes, and Pirelluales (mostly Pirelluaceae) were the most  
146 significantly enriched taxa in the midgut (Figure 2a). In the SG group, Bacteroidetes (mostly  
147 Bacteroidia and *Bacteroides*) and Aeromonadaceae were also the most enriched taxa in the  
148 hindgut, followed by Fusobacteriaceae, but Proteobacteria, Bacilli and Streptococcaceae  
149 (mostly *Streptococcus*) were the most significantly enriched taxa in the midgut (Figure 2b).

#### 150 **Relationships between bacterial communities of different gut segments and diets**

151 A heatmap analysis at the family level showed that samples from the M group formed a single  
152 cluster, clearly distinct from the H group samples (Figure 3). PerMANOVA analysis revealed  
153 a significant difference ( $F=51.29$ ,  $P=0.0001$ ) in the composition of bacterial communities  
154 between M and H groups, but not between FF and SG groups ( $F=1.316$ ,  $P=0.247$ ).  
155 PerMANOVA with "adonis" algorithm indicated that grass carp gut segment contributed  
156 19.8% ( $p<0.001$ ) of the variation of gut bacterial communities, whereas diet contributed only  
157 8.0% ( $p<0.001$ ) (Table 2). Similarly, VPA analysis indicated that gut segments explain 28%  
158 ( $p<0.001$ ) of the variation, and diet 14% ( $p<0.001$ ).

159 PCoA results indicated that midgut and hindgut had significantly different bacterial



160 compositions regardless of diet ( $p=0.0001$  in all cases, PerMANOVA based on weighted  
161 Unifrac; Figure 4). After controlling for the gut compartment, we found a significant  
162 difference in bacterial composition between M-FF and M-SG samples ( $p=0.0324$ ; Figure S3),  
163 but not between H-FF and H-SG samples ( $p=0.2688$ ; Figure S4). We also determined the  
164 OTUs shared between these four groups of samples: M-FF and H-FF samples shared 1608  
165 OTUs, M-SG and H-SG shared 1052, M-FF and M-SG shared 2401, and H-FF and H-SG  
166 groups shared 1272 OTUs (Figure S5).

### 167 **Functional prediction of the midgut and hindgut microbiome**

168 To infer the functional profiles of midgut and hindgut microbiomes, microbial 16S rRNA  
169 sequence data were analyzed by PICRUST to predict the dominant gene families. KEGG  
170 database level 2 query assigned the genes to 41 functional groups, predominantly to 'poorly  
171 characterized', 'membrane transport', and 'nucleotide metabolism' (Figure 5). Nineteen gene  
172 families exhibited significant ( $p<0.05$ ) differences between midgut and hindgut. The  
173 pathways these gene families were mainly associated with metabolic pathways: xenobiotics  
174 biodegradation and metabolism, nucleotide metabolism, metabolism of terpenoids and  
175 polyketides, metabolism of cofactors and vitamins, lipid metabolism, glycan biosynthesis and  
176 metabolism, energy metabolism, and carbohydrate metabolism. Some oxygen-independent  
177 pathways (especially fructose/mannose and starch/sucrose metabolisms) were also enriched in  
178 the hindgut samples (Figure S6).

### 179 **DISCUSSION**

180 Substantial research has been carried out in recent decades to better understand the

181 complexity and diversity of gut microbiota in fish (22, 23, 37). Diet is known to be a very  
182 important factor influencing the intestinal bacterial composition. For example, in the Atlantic  
183 cod (*Gadus morhua* L), gram-positive *Brochothrix* and *Carnobacterium* were dominant in the  
184 gut of a fishmeal diet-fed fish, *Psychrobacter* dominated in the bioprocessed soy bean meal  
185 group, and *Carnobacterium*, *Chryseobacterium* and *Psychrobacter glacincola* dominated in  
186 the soy bean meal diet group (35). However, the impact of different gut compartments on the  
187 bacterial composition remains unstudied in fish.

188 Our study provides a detailed comparison of bacterial communities in different gut  
189 segments in a herbivorous fish, in combination with two strikingly different diets. Heatmap  
190 analysis indicated that midgut samples from both diet groups formed a single cluster,  
191 significantly different from the hindgut samples of both diet groups. This suggests that the  
192 composition of microbiome was impacted more substantially by the gut compartment than by  
193 the diet. However, large SD values observed in all of these analyses, as well as comparison  
194 with previous studies of this species (16), indicate that individual variability also plays a  
195 major role in determining the microbial composition.

196 This dramatic difference in the microbiome composition between midgut and hindgut  
197 may be related to gut morphology and physicochemical conditions (38, 39). Obligate  
198 anaerobes, including *Bacteroides* (Bacteroidetes), Fusobacteriaceae (Fusobacteria), and  
199 Clostridiales and Erysipelotrichaceae (Firmicutes), were significantly more abundant in  
200 hindgut samples than in midgut samples. Proteobacteria, however, were more abundant in the  
201 midgut samples. Metagenomes also revealed increasing prevalence of anaerobic metabolism

202 in hindgut in comparison to midgut, which included fructose and mannose metabolism,  
203 galactose metabolism, and starch and sucrose metabolism. The observed shift towards  
204 obligate anaerobes is expected, as the hindgut is characterized by extremely low oxygen  
205 concentrations in most animals (40). *Bacteroides* was also reported as the most abundant  
206 taxon in the distal gut segments of a broad spectrum of animal species, from mammals (sheep  
207 rectum) (18) to insects (*Pachnoda ehippiata*, distal gut) (41). However, dominant taxa varied  
208 among the proximal gut samples of these three species: *Streptococcus* in sheep jejunum (18),  
209 aerobic Actinobacteria in the midgut of *P. ehippiata* (41), and Proteobacteria in grass carp.  
210 Therefore, oxygen levels are the most likely explanation for the observed significant  
211 difference in the bacterial composition between bacterial communities of midgut but not  
212 hindgut samples of the two diet groups: in an aerobic environment, diet is the major factor  
213 determining the microbial composition, but as the environment turns anaerobic, it becomes  
214 hospitable only for a limited number of microbial taxa, resulting in shrinking microbial  
215 richness and diversity indices.

216 As diet is believed to be the most important force shaping the gut bacterial community  
217 (34-36), we also studied the impacts of two very different diets: Sudan grass and formula feed.  
218 When each diet was considered independently, bacterial community richness of the FF group  
219 was significantly higher than that of the SG group. Bacteroidetes (non-significantly) and  
220 *Bacteroides* were more abundant in the SG group. The genome of *Bacteroides* is enriched in  
221 glycoside hydrolase and polysaccharide lyase genes, targeting the degradation of the plant cell  
222 wall polysaccharides (16). Hence, high abundance of *Bacteroides* in the SG group probably

223 reflects the high proportion of fiber in this diet. Similarly, gut microbiomes of high-fiber diet  
224 consuming humans are highly enriched in Bacteroidetes (42). On the other hand, the  
225 *Cetobacterium* genus was significantly more abundant in the FF group (compared to SG  
226 group). This genus is known to be in a positive correlation with the production of acetic and  
227 propionic acids through peptone and glucose fermentation (43), and numerous gene families  
228 associated with protein digestion (peptidases) are present in the genome of *C. somerae*, which  
229 is an indigenous bacterium in the digestive tract of freshwater fish (16). This could be an  
230 explanation behind the high abundance of this microbe in high-protein formula feed diet-fed  
231 fish (16, 25).

## 232 **Conclusions**

233 Composition of the intestinal bacterial community is determined by a large number of  
234 factors, including the host's diet, gut compartment, life history, genetics, and environmental  
235 factors (3, 4), but diet is believed to outweigh the host's genotype in shaping the gut  
236 microbiota (33). We found that the opposite is true for gut segments: both PerMANOVA and  
237 VPA analyses indicated that gut segments explain a higher proportion of the variation in  
238 intestinal microbiota than the diet. Despite the large individual variability observed, these  
239 results indicate that we can reject our working hypothesis, as intestinal anatomy and  
240 physiology appear to be a stronger determinant in shaping the intestinal microbiota than host's  
241 diet. Apart from the understanding of bacterial functions in different gut segments, this  
242 finding also bears relevance for the interpretation of past studies and design of future studies  
243 of intestinal microbiota, which should pay close attention to the intestinal segment variability.

## 244 **MATERIALS AND METHODS**

### 245 **Sample collection**

246 Juvenile fish were purchased commercially and kept in artificial earthen ponds in Huanggang  
247 City, Hubei Province, China, from April to August, 2015. Six ponds (with 30 fish in each  
248 pond; 1.5-2.0 m depth, 100m<sup>2</sup> surface) were divided into two groups: one group was fed the  
249 Sudan grass diet (SG group) and the other was fed the formula feed diet (FF group). The  
250 Sudan grass diet contained 29% crude fiber and 10.37% crude protein, whereas the formula  
251 feed diet contained 6.9% crude fiber and 40.45% crude protein (44). The fish were fed to  
252 apparent satiation twice a day (8:00 and 16:00 o'clock). After the feeding experiment (16  
253 weeks), six grass carp specimens were randomly collected from each pond (6×6=36  
254 specimens). Fishes were euthanized in buffered MS-222 at 250 mg/L concentration, measured  
255 (weight and length) and immediately dissected in sterile conditions. Body length was  
256 30.67±2.73 cm and weight was 486.57±126.99g. Intestines were divided into segments as  
257 described before (27), the entire content of midgut and hindgut collected, separately placed  
258 into labelled 25mL polypropylene centrifuge tubes, frozen provisionally in a portable  
259 refrigerator, transported to laboratory within six hours and stored at -80 °C. This study has  
260 been reviewed and approved by the ethics committee of the Institute of Hydrobiology,  
261 Chinese Academy of Sciences.

### 262 **DNA extraction, PCR amplification and sequencing**

263 Genomic DNA was extracted from 72 samples (36 specimens× 2 gut segments) using  
264 QIAamp DNA stool mini kit (Qiagen, Germany) according to the manufacturer's instructions.

265 DNA concentrations were estimated using a Nanodrop 8000 Spectrophotometer (Thermos,  
266 USA). Obtained DNA samples were used for the amplification of bacterial V4-V5 16S rRNA  
267 gene region with universal barcode primers 515F (5'-GTGYCAGCMGCCGCGGTA-3') and  
268 909R (5'-CCCGYCAATTCMTTTRAGT-3') (45). PCR reaction mix (25 $\mu$ L) contained 0.5U  
269 of the Phusion high-fidelity DNA polymerase (New England Biolabs, Beijing China Ltd),  
270 5 $\times$ Phusion GC buffer, 5mM dNTP, 20 $\mu$ M primers and 50ng DNA. An initial denaturation at  
271 98 $^{\circ}$ C for 30s was followed by 25 cycles (98 $^{\circ}$ C for 10s, 55 $^{\circ}$ C for 20s and 72 $^{\circ}$ C for 20s) and the  
272 final extension step for 10min at 72 $^{\circ}$ C. PCR products were purified using AidQuick Gel  
273 Extraction Kit (Aidlab Biotech, Beijing, China). Purified samples were sequenced using  
274 Novogene bioinformatics technology on the Illumina Hiseq 2500 platform.

### 275 **Bioinformatic and statistical analyses**

276 Raw sequenced data were analyzed using QIIME Pipeline-version 1.7.0 (46). Each sample  
277 was distinguished according to its unique barcode sequence (barcode mismatches=0). The  
278 first processing step was merging paired-end reads using FLASH-1.2.8 program (47). Only  
279 the merged sequences with high-quality reads (length>300 bp, without ambiguous base N,  
280 and average base quality score>30) were used for further analyses. Sequence chimeras were  
281 removed using the UCHIME algorithm (48). All sequences were grouped as operational  
282 taxonomic units (OTUs), applying a 97% identity threshold. Singletons and chloroplasts were  
283 filtered out. The sequence number of each sample was normalized to 11000 sequences. All  
284 sequences analyzed in this study can be accessed in the SRA database under the accession  
285 number SRP 131857.

286 Samples (n=72) were grouped using different criteria, diets (FF + SG, n=36), gut  
287 segments (Midgut + Hindgut, n=36), diet+segment (H-FF, M-FF, H-SG, M-SG; n=18), and  
288 statistically analysed. Alpha diversity indices of gut bacterial communities, including  
289 community richness (Chao1 and Ace) and diversity (Shannon and Simpson), were calculated  
290 using the QIIME package. To evaluate the beta diversity and visualize differences in the  
291 bacterial community structure, principal coordinates analysis (PCoA) was conducted using  
292 the weighted UniFrac distance. To identify relative abundance of bacterial biomarker taxa at  
293 the genus level between the midgut and hindgut of different diet groups, linear discriminant  
294 analysis coupled with effect size (Lefse) was employed on the Huttenhower laboratory  
295 Galaxy website (<http://huttenhower.sph.harvard.edu/galaxy/>) (49). Default logarithmic (LDA)  
296 score value thresholds were set at 2.0 (to identify all significantly different taxa) and 4.0 (to  
297 generate publishable figures focusing only on the most significantly different taxa). Venn  
298 diagram was used to display shared OTUs between different parts of the intestine and  
299 different diets (50). To reveal the similarities and differences among groups, a heatmap plot  
300 was constructed on the basis of the mean relative abundance of bacterial families which  
301 exceeded 0.1% in each sample. PICRUST1.0 (51) and KEGG database were used to explore  
302 functional profiles of the bacteriome in different gut segments. Bar graph was constructed  
303 using OriginPro 8.5 (52), and STAMPv2.1.3 (53) was used for statistical analyses of  
304 functional profiles. Statistical differences were calculated using Welch's t-test with Bonferroni  
305 correction, with statistical significance threshold set at 0.05. Permutational multivariate  
306 analyses of variance (PerMANOVA) were performed using PAST 2.16 (54) to assess the

307 significance of differences in the bacterial community structure among different groups, based  
308 on weighted UniFrac distance. PerMANOVA with "adonis" procedure was used to evaluate  
309 whether the diet and the gut segment significantly affected the bacterial community structure  
310 of grass carp. Variance Partitioning Analysis (VPA) was used to evaluate the contribution of  
311 gut segments and diets to the microbial community variance.

312

313



314 **ACKNOWLEDGMENTS**

315 This work was supported by the National Natural Science Foundation of China (grants No.  
316 31272706 and No. 31372571); and the earmarked fund for the China Agriculture Research  
317 System (No. CARS-45-08).

318

319

320

321 **REFERENCES**

- 322 1. Nicholson JK, Holmes E, Wilson ID (2005) Gut microorganisms, mammalian metabolism  
323 and personalized health care. *Nature Reviews Microbiology*, **3**, 431-438.
- 324 2. Torok VA, Ophel-Keller K, Loo M, Hughes RJ (2008) Application of Methods for  
325 Identifying Broiler Chicken Gut Bacterial Species Linked with Increased Energy  
326 Metabolism. *Applied & Environmental Microbiology*, **74**, 783-791.
- 327 3. Wu S, Wang G, Angert ER, Wang W, Li W, Zou H (2012a) Composition, diversity, and  
328 origin of the bacterial community in grass carp intestine. *PloS one*, **7**, e30440.
- 329 4. Ley RE, Lozupone CA, Hamady M, Knight R, Gordon JI (2008b) Worlds within worlds:  
330 evolution of the vertebrate gut microbiota. *Nature Reviews Microbiology*, **6**, 776-788.
- 331 5. Gilbert SF, Sapp J, Tauber A I. (2012) A symbiotic view of life: we have never been  
332 individuals. *The Quarterly review of biology*, **87**, 325-341.
- 333 6. Bäckhed F, Ding H, Wang T, Hooper LV, Koh GY, Nagy A, Semenkovich CF, Gordon JI  
334 (2004) The gut microbiota as an environmental factor that regulates fat storage.  
335 *Proceedings of the National Academy of Sciences of the United States of America*, **101**,  
336 15718-15723.
- 337 7. Rawls JF, Mahowald MA, Ley RE, Gordon JI (2006) Reciprocal gut microbiota transplants  
338 from zebrafish and mice to germ-free recipients reveal host habitat selection. *Cell*, **127**,  
339 423-433.
- 340 8. Wu GD, Chen J, Hoffmann C, Bittinger K, Chen Y-Y, Keilbaugh SA, Bewtra M, Knights D,  
341 Walters WA, Knight R (2011) Linking long-term dietary patterns with gut microbial  
342 enterotypes. *Science*, **334**, 105-108.
- 343 9. Miyake S, Ngugi DK, Stingl U (2015) Diet strongly influences the gut microbiota of  
344 surgeonfishes. *Molecular ecology*, **24**, 656-672.
- 345 10. Gacias M, Gaspari S, Santos PM, Tamburini S, Andrade M, Zhang F, Shen N, Tolstikov V,  
346 Kiebish MA, Dupree JL, Zachariou V, Clemente JC, Casaccia P (2016)  
347 Microbiota-driven transcriptional changes in prefrontal cortex override genetic  
348 differences in social behavior. *Elife*, **5**, e13442. doi: 10.7554/eLife.13442.
- 349 11. Rees T, Bosch T, Douglas AE (2018). How the microbiome challenges our concept of self.  
350 *PLOS Biology*, **16**, e2005358.
- 351 12. Faith JJ, Guruge JL, Charbonneau M, Subramanian S, Seedorf H, Goodman AL, Clemente  
352 JC, Knight R, Heath AC, Leibel RL (2013) The long-term stability of the human gut  
353 microbiota. *Science*, **341**, 1237439.
- 354 13. Benson AK, Kelly SA, Legge R, Ma F, Low SJ, Kim J, Zhang M, Oh PL, Nehrenberg D,  
355 Hua K (2010) Individuality in gut microbiota composition is a complex polygenic trait  
356 shaped by multiple environmental and host genetic factors. *Proceedings of the*  
357 *National Academy of Sciences*, **107**, 18933-18938.
- 358 14. Qin J, Li R, Raes J, Arumugam M, Burgdorf KS, Manichanh C, Nielsen T, Pons N,  
359 Levenez F, Yamada T (2010) A human gut microbial gene catalogue established by  
360 metagenomic sequencing. *Nature*, **464**, 59-65.
- 361 15. Ley RE, Hamady M, Lozupone C, Turnbaugh PJ, Ramey RR, Bircher JS, Schlegel ML,  
362 Tucker TA, Schrenzel MD, Knight R (2008a) Evolution of mammals and their gut  
363 microbes. *Science*, **320**, 1647-1651.

- 364 16. Hao YT, Wu SG, Xiong F, Tran NT, Jakovlić I, Zou H, Li WX, Wang GT (2017b)  
365 Succession and Fermentation Products of Grass Carp (*Ctenopharyngodon idellus*)  
366 Hindgut Microbiota in Response to an Extreme Dietary Shift. *Frontiers in*  
367 *microbiology*,**8**, 1585.
- 368 17. Perea K, Perz K, Olivo SK, Williams A, Lachman M, Ishaq SL, Thomson J, Yeoman CJ  
369 (2017) Feed efficiency phenotypes in lambs involve changes in ruminal, colonic, and  
370 small-intestine-located microbiota. *Journal of Animal Science*, **95**, 2585–2592.
- 371 18. Zhang H, Shao M, Huang H, Wang S, Ma L, Wang H, Hu L, Wei K, Zhu R (2018) The  
372 dynamic distribution of small-tail Han sheep microbiota across different intestinal  
373 segments. *Frontiers in microbiology*, **9**, 32.
- 374 19. Ley RE, Peterson DA, Gordon JI (2006) Ecological and evolutionary forces shaping  
375 microbial diversity in the human intestine. *Cell*, **124**, 837-848.
- 376 20. Zhang C, Zhang M, Pang X, Zhao Y, Wang L, Zhao L (2012) Structural resilience of the  
377 gut microbiota in adult mice under high-fat dietary perturbations. *The ISME journal*, **6**,  
378 1848-1857.
- 379 21. Feng L, Xia JH, Bai ZY, Fu JJ, Li JL, Yue GH (2009) High genetic diversity and  
380 substantial population differentiation in grass carp (*Ctenopharyngodon idella*)  
381 revealed by microsatellite analysis. *Aquaculture*, **297**, 51-56.
- 382 22. Han S, Liu Y, Zhou Z, He S, Cao Y, Shi P, Yao B, Ringö E (2010) Analysis of bacterial  
383 diversity in the intestine of grass carp (*Ctenopharyngodon idellus*) based on 16S  
384 rDNA gene sequences. *Aquaculture Research*, **42**, 47-56.
- 385 23. Tran NT, Xiong F, Hao YT, Zhang J, Wu SG, Wang GT (2017) Two biomass preparation  
386 methods provide insights into studying microbial communities of intestinal mucosa in  
387 grass carp (*Ctenopharyngodon idellus*). *Aquaculture Research*, **48**, 4272-4283.
- 388 24. Ni J, Yan Q, Yu Y, Wu H, Chen F (2017) Dispersal patterns of endogenous bacteria among  
389 grass carp (*Ctenopharyngodon idellus*) guts. *Iranian Journal of Fisheries Sciences*, **16**,  
390 605-618.
- 391 25. Hao YT, Wu SG, Jakovlić I, Zou H, Li WX, Wang GT (2017a) Impacts of diet on hindgut  
392 microbiota and short - chain fatty acids in grass carp (*Ctenopharyngodon idellus*).  
393 *Aquaculture Research*,**48**, 5595-5605.
- 394 26. Wu S, Ren Y, Peng C, Hao Y, Xiong F, Wang G, Li W, Zou H, Angert ER (2015a)  
395 Metatranscriptomic discovery of plant biomass-degrading capacity from grass carp  
396 intestinal microbiomes. *Fems Microbiology Ecology*, **91**, 370-372.
- 397 27. Ni DS, Wang JG (1999) *Biology and diseases of grass carp*, Science press, Beijing.
- 398 28. Mowat AM, Agace WW (2014) Regional specialization within the intestinal immune  
399 system. *Nature Reviews Immunology*, **14**, 667-685.
- 400 29. Sire M F, Vernier J M. (1992) Intestinal absorption of protein in teleost fish. *Comparative*  
401 *Biochemistry & Physiology Part A Physiology*, **103**, 771–781.
- 402 30. Li H, Wu S, Wirth S, Hao Y, Wang W, Zou H, Li W, Wang G (2016) Diversity and activity  
403 of cellulolytic bacteria, isolated from the gut contents of grass carp  
404 (*Ctenopharyngodon idellus*) (Valenciennes) fed on Sudan grass (*Sorghum sudanense*)  
405 or artificial feedstuffs. *Aquaculture research*, **47**, 153-164.

- 406 31. Wu Z, Feng X, Xie L, Peng X, Yuan J, Chen X (2012b) Effect of probiotic *Bacillus*  
407 *subtilis* Ch9 for grass carp, *Ctenopharyngodon idella* (Valenciennes, 1844), on growth  
408 performance, digestive enzyme activities and intestinal microflora. *Journal of Applied*  
409 *Ichthyology*, **28**, 721-727.
- 410 32. Wu ZQ, Jiang C, Ling F, Wang G-X (2015b) Effects of dietary supplementation of  
411 intestinal autochthonous bacteria on the innate immunity and disease resistance of  
412 grass carp (*Ctenopharyngodon idellus*). *Aquaculture*, **438**, 105-114.
- 413 33. Carmody RN, Gerber GK, Jr LJ, Gatti DM, Somes L, Svenson KL, Turnbaugh PJ (2015)  
414 Diet dominates host genotype in shaping the murine gut microbiota. *Cell Host &*  
415 *Microbe*, **17**, 72-84.
- 416 34. Ringø E, Olsen R (1999) The effect of diet on aerobic bacterial flora associated with  
417 intestine of Arctic charr (*Salvelinus alpinus* L.). *Journal of Applied Microbiology*, **86**,  
418 22-28.
- 419 35. Ringø E, Sperstad S, Myklebust R, Refstie S, Krogdahl Å (2006) Characterisation of the  
420 microbiota associated with intestine of Atlantic cod (*Gadus morhua* L.): the effect of  
421 fish meal, standard soybean meal and a bioprocessed soybean meal. *Aquaculture*, **261**,  
422 829-841.
- 423 36. Tajima K, Aminov R, Nagamine T, Matsui H, Nakamura M, Benno Y (2001)  
424 Diet-dependent shifts in the bacterial population of the rumen revealed with real-time  
425 PCR. *Applied and environmental microbiology*, **67**, 2766-2774.
- 426 37. Sugita H, Tokuyama K, Deguchi Y (1985) The intestinal microflora of carp *Cyprinus*  
427 *carpio*, grass carp *Ctenopharyngodon idella* and tilapia *Sarotherodon niloticus*.  
428 *Bulletin of the Japanese Society of Scientific Fisheries*, **51**, 1325-1329.
- 429 38. Brune A (1998) Termite guts: the world's smallest bioreactors. *Trends in Biotechnology*, **16**,  
430 16-21.
- 431 39. Brune A, Friedrich M (2000) Microecology of the termite gut: structure and function on a  
432 microscale. *Current opinion in microbiology*, **3**, 263-269.
- 433 40. Mackie RI, White BA (2012) Gastrointestinal microbiology. Volume 1: Gastrointestinal  
434 ecosystems and fermentations. *Biochemical Engineering Journal 2008 Vol. 42 No. 3*  
435 *pp. 314-319*.
- 436 41. Egert M, Wagner B, Lemke T, Brune A, Friedrich MW (2003) Microbial community  
437 structure in midgut and hindgut of the humus-feeding larva of *Pachnoda ephippiata*  
438 (Coleoptera: Scarabaeidae). *Applied and Environmental Microbiology*, **69**, 6659-6668.
- 439 42. Maslowski KM, Mackay CR (2011) Diet, gut microbiota and immune responses. *Nature*  
440 *immunology*, **12**, 5-9.
- 441 43. Tsuchiya C, Sakata T, Sugita H (2008) Novel ecological niche of *Cetobacterium somerae*,  
442 an anaerobic bacterium in the intestinal tracts of freshwater fish. *Letters in applied*  
443 *microbiology*, **46**, 43-48.
- 444 44. Zhang J, Xiong F, Wang GT, Li WX, Li M, Zou H, Wu SG (2017) The influence of diet on  
445 the grass carp intestinal microbiota and bile acids. *Aquaculture Research*, **48**,  
446 4934-4944.
- 447 45. Baker GC, Smith JJ, Cowan DA (2003) Review and re-analysis of domain-specific 16S

- 448 primers. *Journal of Microbiological Methods*, **55**, 541–555.
- 449 46. Caporaso JG, Kuczynski J, Stombaugh J, Bittinger K, Bushman FD, Costello EK, Huttley  
450 GA (2010) QIIME allows analysis of high-throughput community sequencing data.  
451 *Nature methods*, **7**, 335-336.
- 452 47. Magoč T, Salzberg SL (2011) FLASH: fast length adjustment of short reads to improve  
453 genome assemblies. *Bioinformatics*, **27**, 2957-2963.
- 454 48. Edgar RC, Haas BJ, Clemente JC, Quince C, Knight R (2011) UCHIME improves  
455 sensitivity and speed of chimera detection. *Bioinformatics*, **27**, 2194-2200.
- 456 49. Segata N, Izard J, Waldron L, et al (2011) Metagenomic biomarker discovery and  
457 explanation. *Genome Biology*, **12**, 1-18.
- 458 50. Chow S, Ruskey F (2003) Drawing Area-Proportional Venn and Euler Diagrams. *Lecture*  
459 *Notes in Computer Science*, **2912**, 466-477.
- 460 51. Langille MG, Zaneveld J, Caporaso JG, McDonald D, Knights D, Reyes JA, Clemente JC,  
461 Burkepille DE, Thurber RLV, Knight R (2013) Predictive functional profiling of  
462 microbial communities using 16S rRNA marker gene sequences. *Nature biotechnology*,  
463 **31**, 814-821.
- 464 52. Stevenson KJ (2015) Review of OriginPro 8.5. *Journal of the American Chemical Society*,  
465 **133**: 5621-5621.
- 466 53. Parks DH, Tyson GW, Hugenholtz P, Beiko RG (2014) STAMP: statistical analysis of  
467 taxonomic and functional profiles. *Bioinformatics*, **30**, 3123-3124.
- 468 54. Hammer O (2001) PAST : Paleontological Statistics Software Package for Education and  
469 Data Analysis. *Palaeontologia Electronica*, **4**, 1-9.
- 470
- 471

472 **DATA ACCESSIBILITY**

473 All sequences analyzed in this study can be accessed in the SRA database under the accession  
474 number SRP 131857 (<https://www.ncbi.nlm.nih.gov/Traces/study/?acc=SRP131857>).

475

476 **AUTHOR CONTRIBUTIONS**

477 The author contributions are as follows: S.G.W. and G.T.W. were principal investigators and  
478 contributed to the study design, acquisition of funding and overseeing the study, interpretation  
479 of data and manuscript editing. W.W.F. and J.Z. were in charge of the design, data collection,  
480 analysis and interpretation of data and manuscript drafting. F.X. contributed to data analysis  
481 and interpretation. I.J. was in charge of quality control, interpretation of the data and co-wrote  
482 the manuscript. H.Z., W.X.L. and M.L. were in charge of study coordination, quality control,  
483 and manuscript editing.

484

485 **Tables**

486 Table 1 Summary of alpha diversity estimators for microbial communities of four groups.  
 487 M-FF, midgut samples of the group fed on formula fed; M-SG, midgut samples of the group  
 488 fed on Sudan grass; H-FF, hindgut samples of the group fed on formula fed; H-SG, hindgut  
 489 samples of the group fed on Sudan grass.

| Group | Richness estimates |                | Diversity estimates |           | Good's coverage |
|-------|--------------------|----------------|---------------------|-----------|-----------------|
|       | Chao 1             | ACE            | Shannon             | Simpson   | Mean±SD         |
|       | Mean±SD            |                | Mean±SD             |           |                 |
| M-FF  | 1351.30±345.69     | 1413.41±338.80 | 6.66±2.03           | 0.91±0.16 | 0.96±0.01       |
| M-SG  | 938.10±413.70      | 975.91±452.78  | 5.58±1.38           | 0.91±0.09 | 0.94±0.05       |
| H-FF  | 796.19±345.69      | 850.99±338.80  | 4.03±2.03           | 0.81±0.16 | 0.98±0.01       |
| H-SG  | 527.37±413.70      | 533.72±452.78  | 3.45±1.38           | 0.76±0.09 | 0.99±0.05       |

490  
 491 Table 2 Quantitative effects of gut segment and diet on the intestinal bacterial community  
 492 assessed using permutational multivariate analyses of variance with Adonis function. R<sup>2</sup>  
 493 values represent the proportion of the community variation explained by each variable.

|                     | Gut segment    |         | Diet           |         | Gut segment : Diet |       |
|---------------------|----------------|---------|----------------|---------|--------------------|-------|
|                     | R <sup>2</sup> | p       | R <sup>2</sup> | P       | R <sup>2</sup>     | P     |
| Community variation | 0.198          | < 0.001 | 0.080          | < 0.001 | 0.041              | 0.001 |

495

496 **Figure legends**

497 Figure 1 Composition of bacteria in four groups at the phylum level. Each bar represents the  
498 community of a sample. Only those phyla with mean relative abundance >1% are shown;  
499 whereas low abundance phyla were assigned to 'others'.

500  
501 Figure 2 Bacterial taxa significantly different between the M-FF and H-FF groups (2a) or  
502 between the M-SG and H-SG groups (2b) identified by linear discriminant analysis coupled  
503 with effect size (LefSe) with LDA value set at 4.0.

504  
505 Figure 3 A heatmap plot depicting the relative percentage of each bacterial family with mean  
506 relative abundance >1% (variables clustering on the Y-axis) within each sample (X-axis  
507 clustering). Relationships among groups were determined using the Hierarchical clustering. In  
508 the heatmap, red colour indicates higher relative abundance, whereas blue colour indicates a  
509 lower relative abundance.

510  
511 Figure 4 Principal coordinate analysis (PCoA) based on weighted UniFrac distances  
512 illustrating community dissimilarities over different gut segments and diet samples.

513  
514 Figure 5 Functional profiling of midgut and hindgut microbial communities predicted by  
515 PICRUSt in the KEGG database (level 2). The significance level is indicated by \*p<0.05;  
516 \*\*p<0.01; \*\*\*p<0.001.





■ M-FF group    ■ H-FF group

bioRxiv preprint doi: <https://doi.org/10.1101/356030>; this version posted June 26, 2018. The copyright holder for this preprint (which was not certified by peer review) is the author/funder, who has granted bioRxiv a license to display the preprint in perpetuity. It is made available under aCC-BY-NC 4.0 International license.

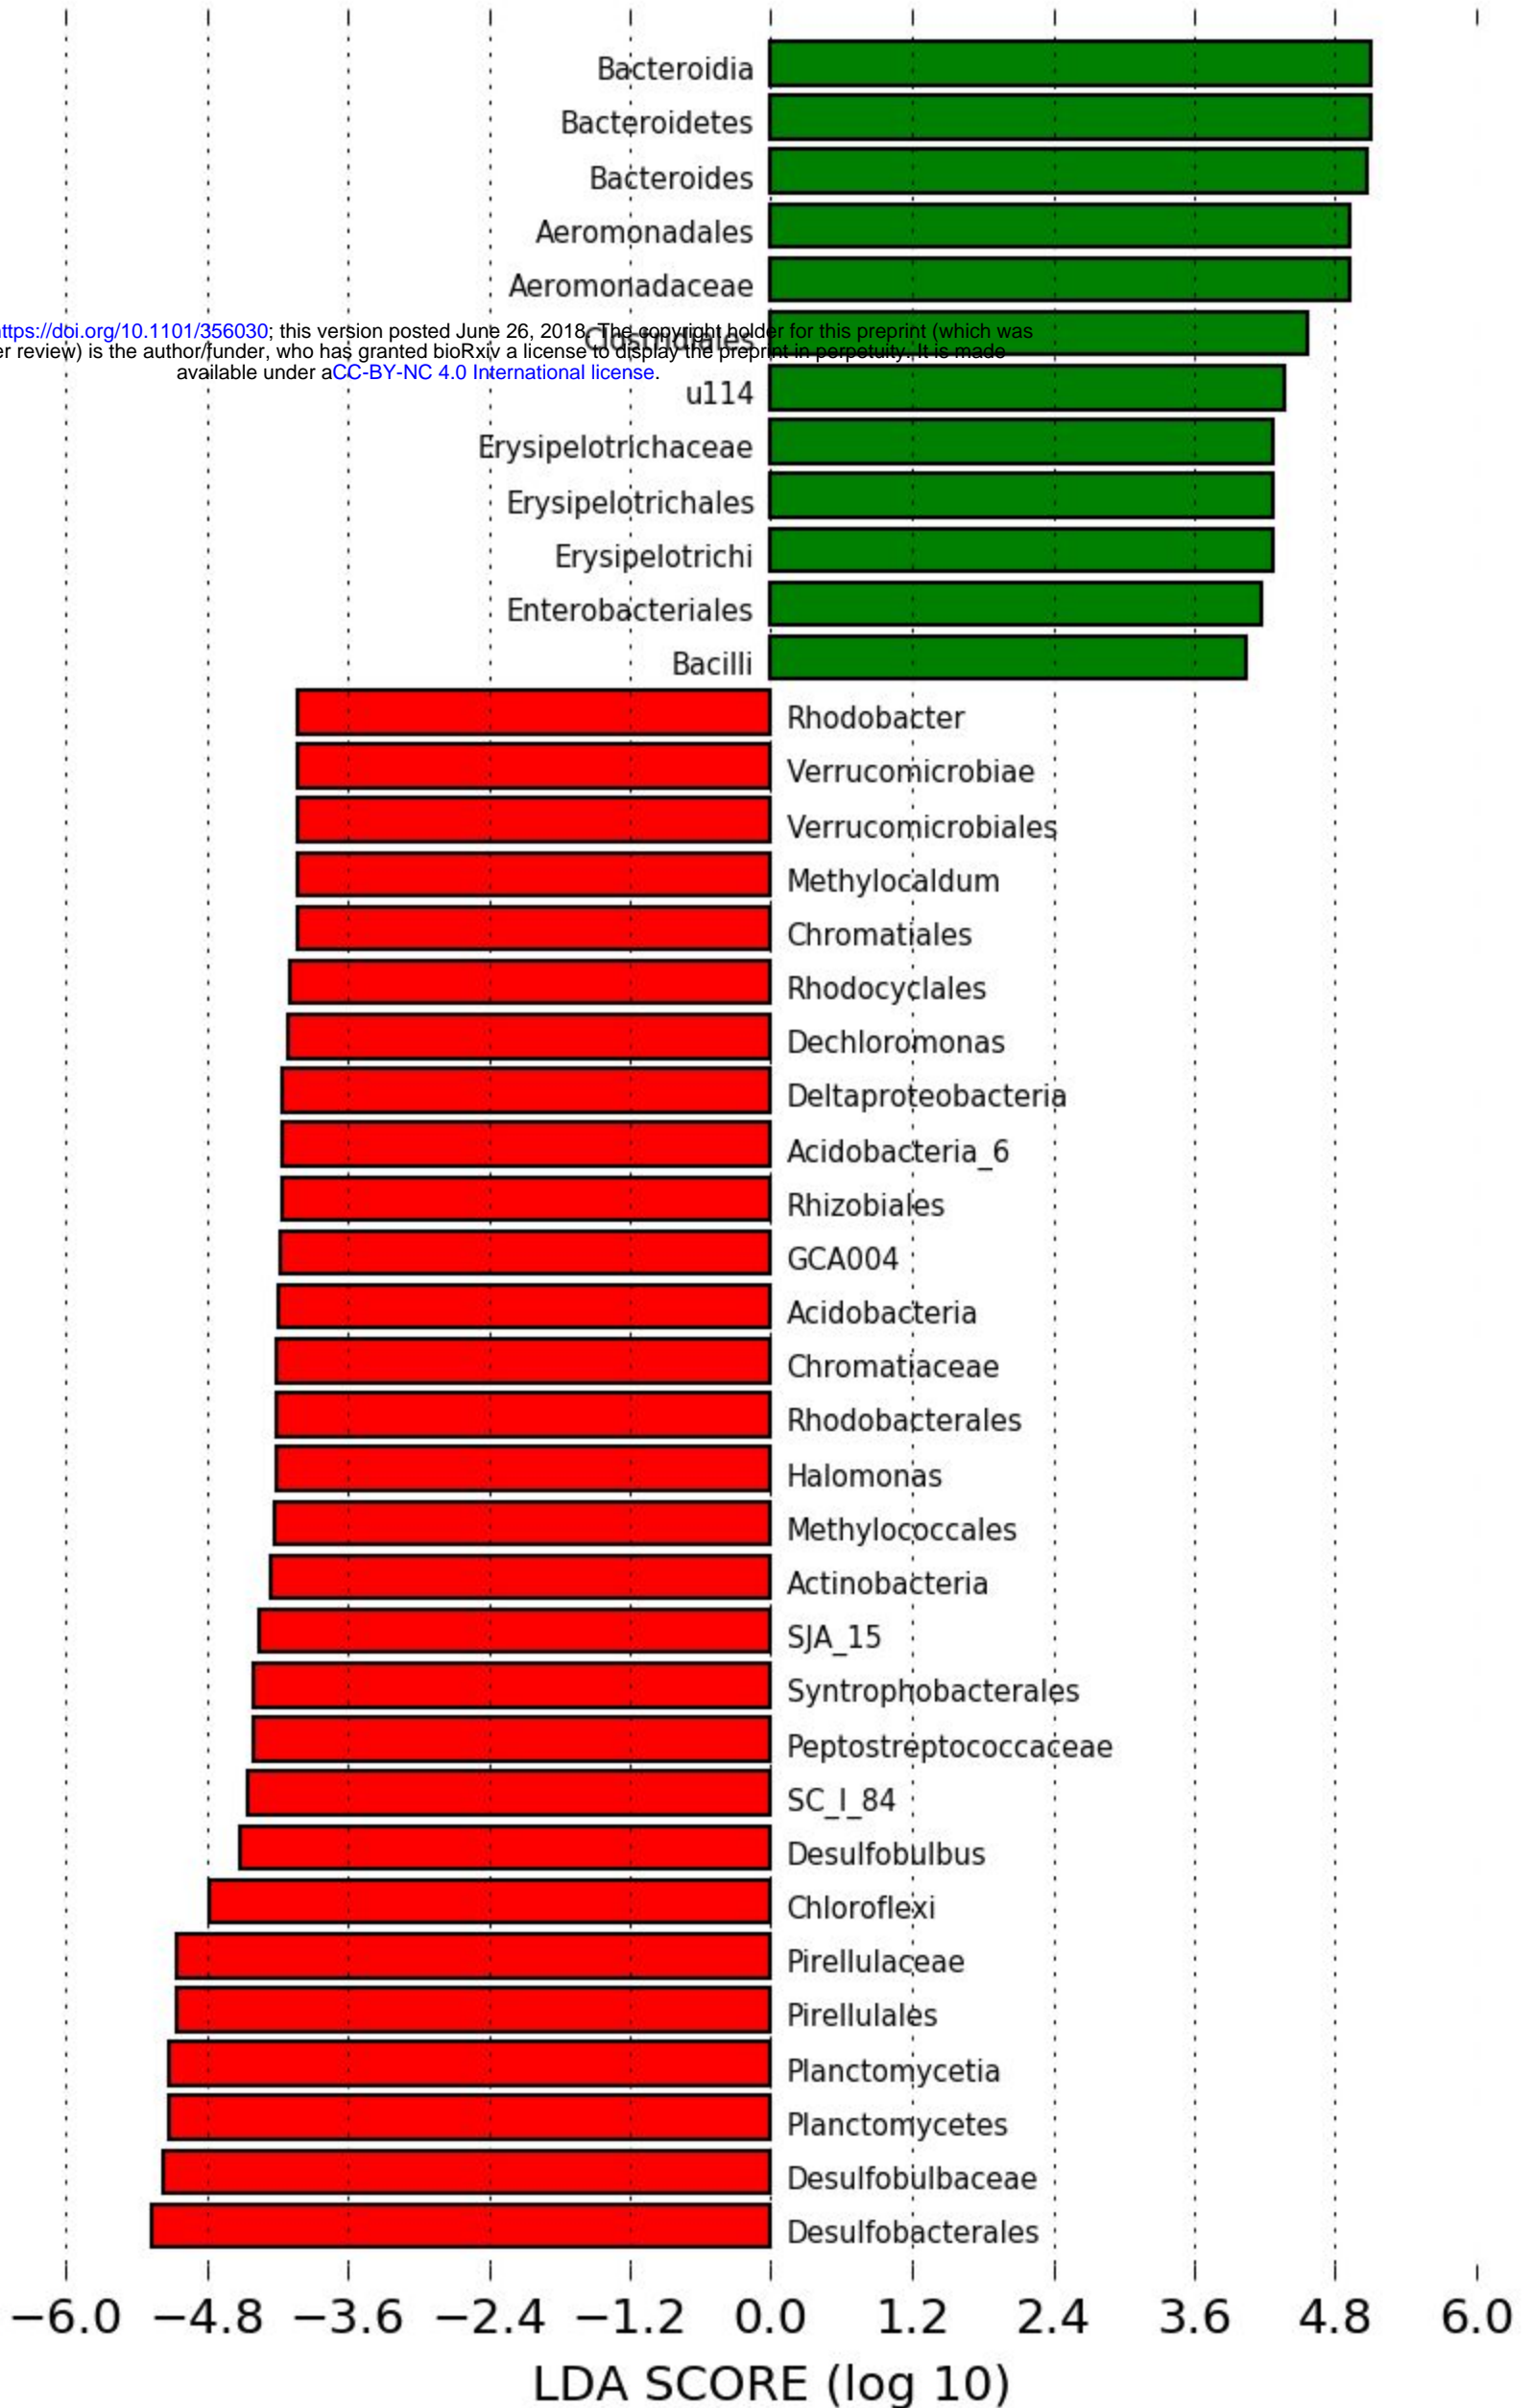

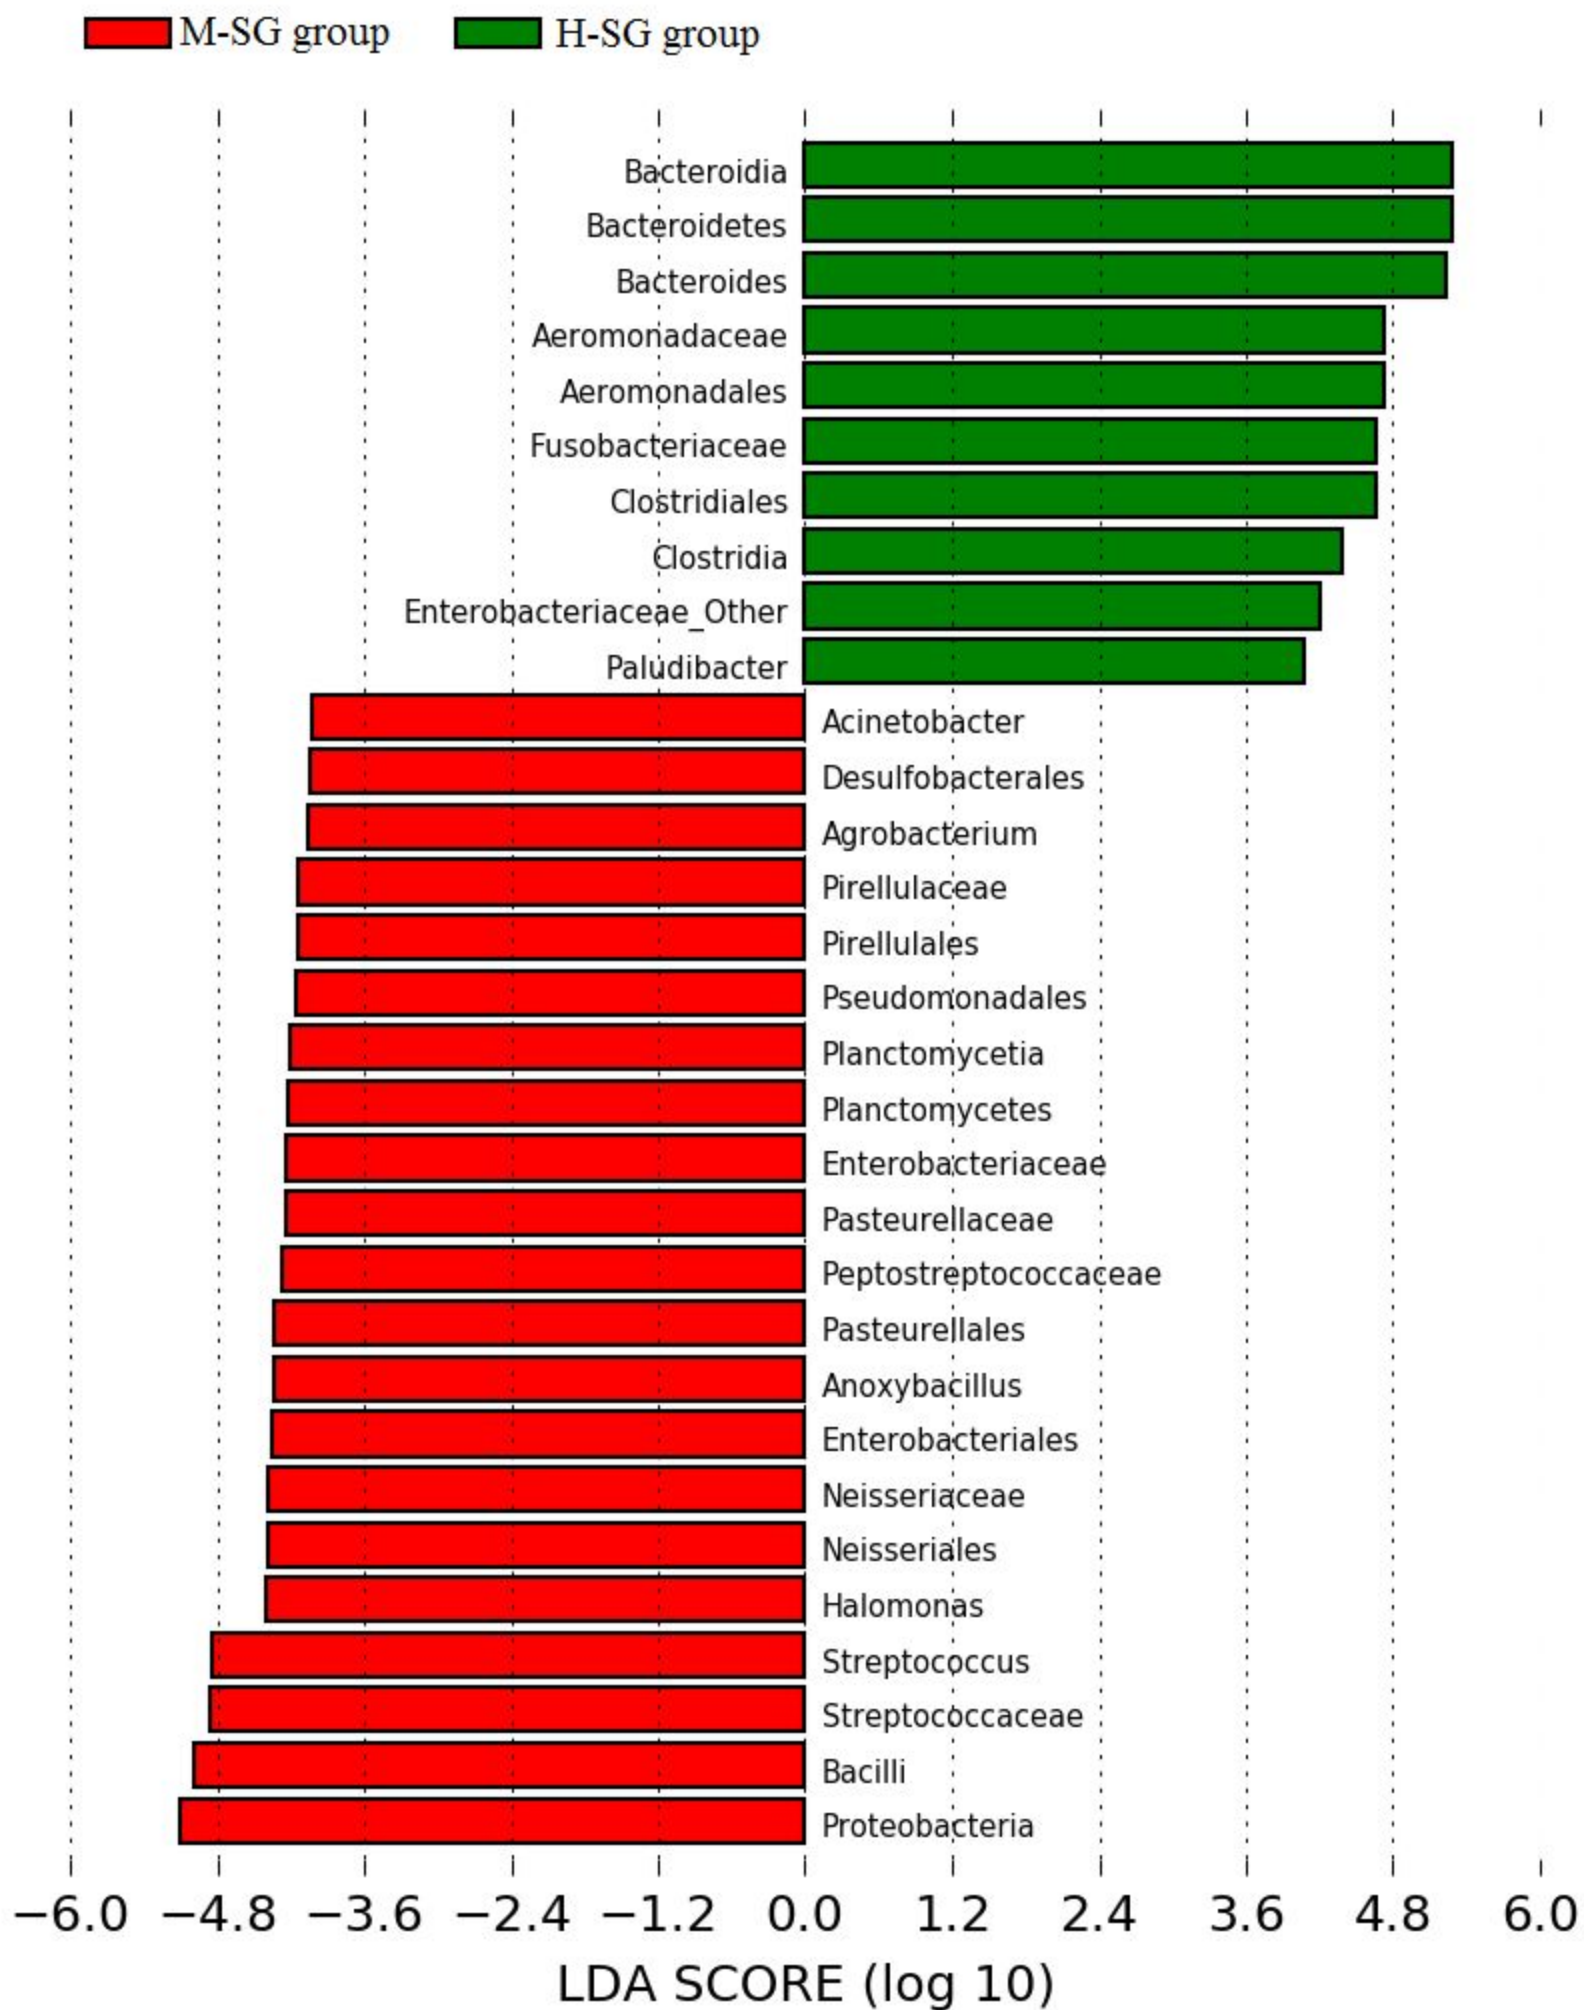



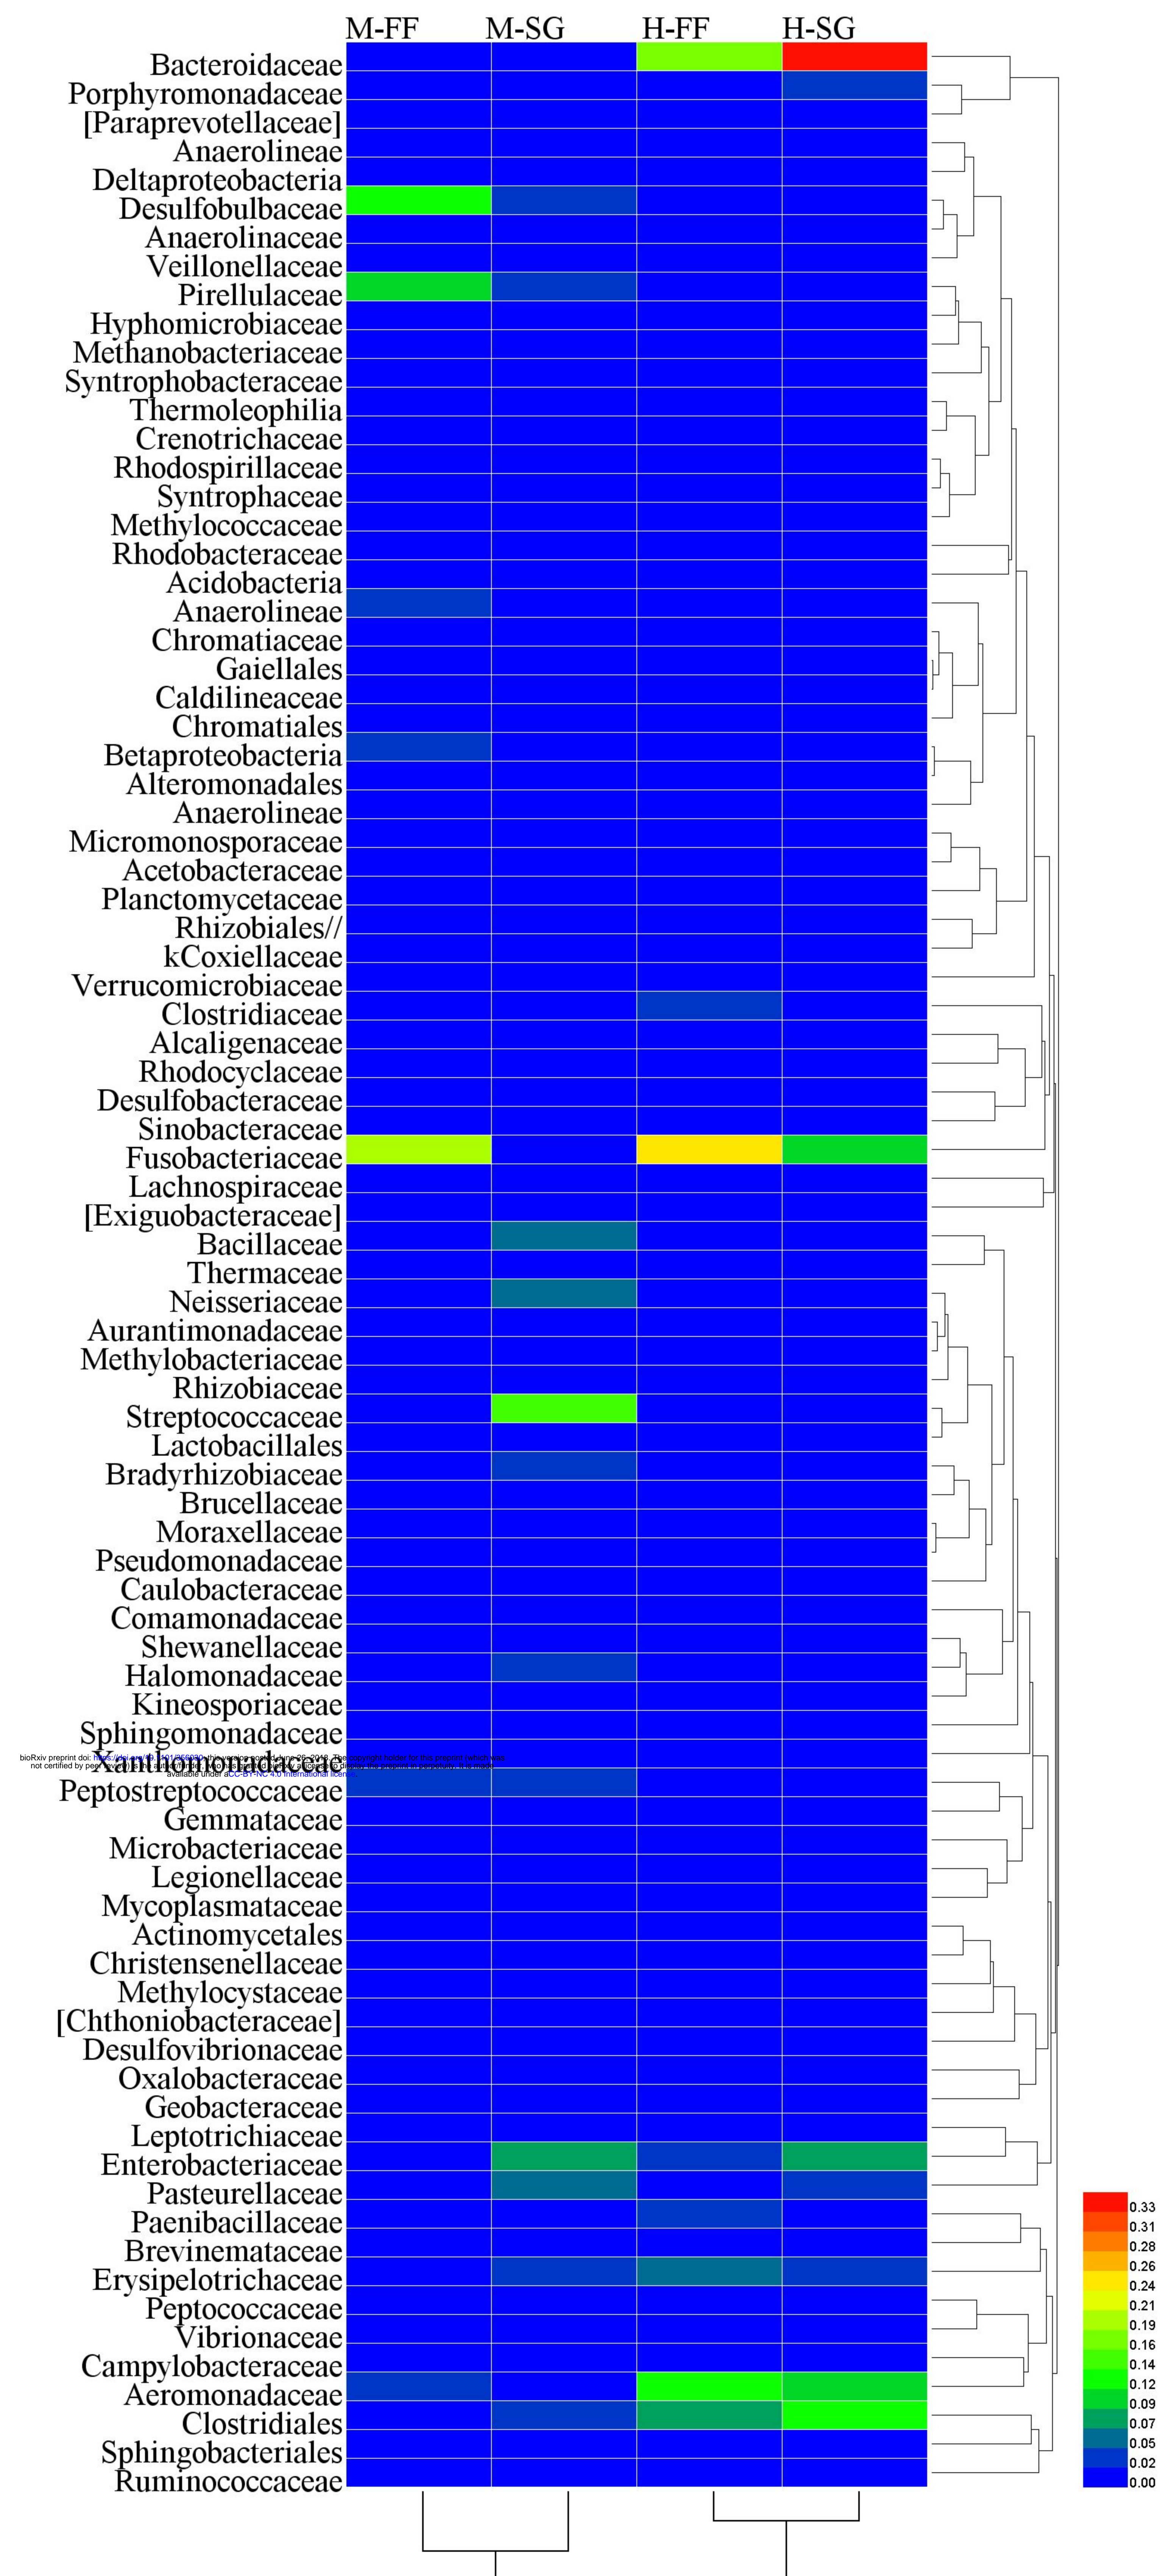



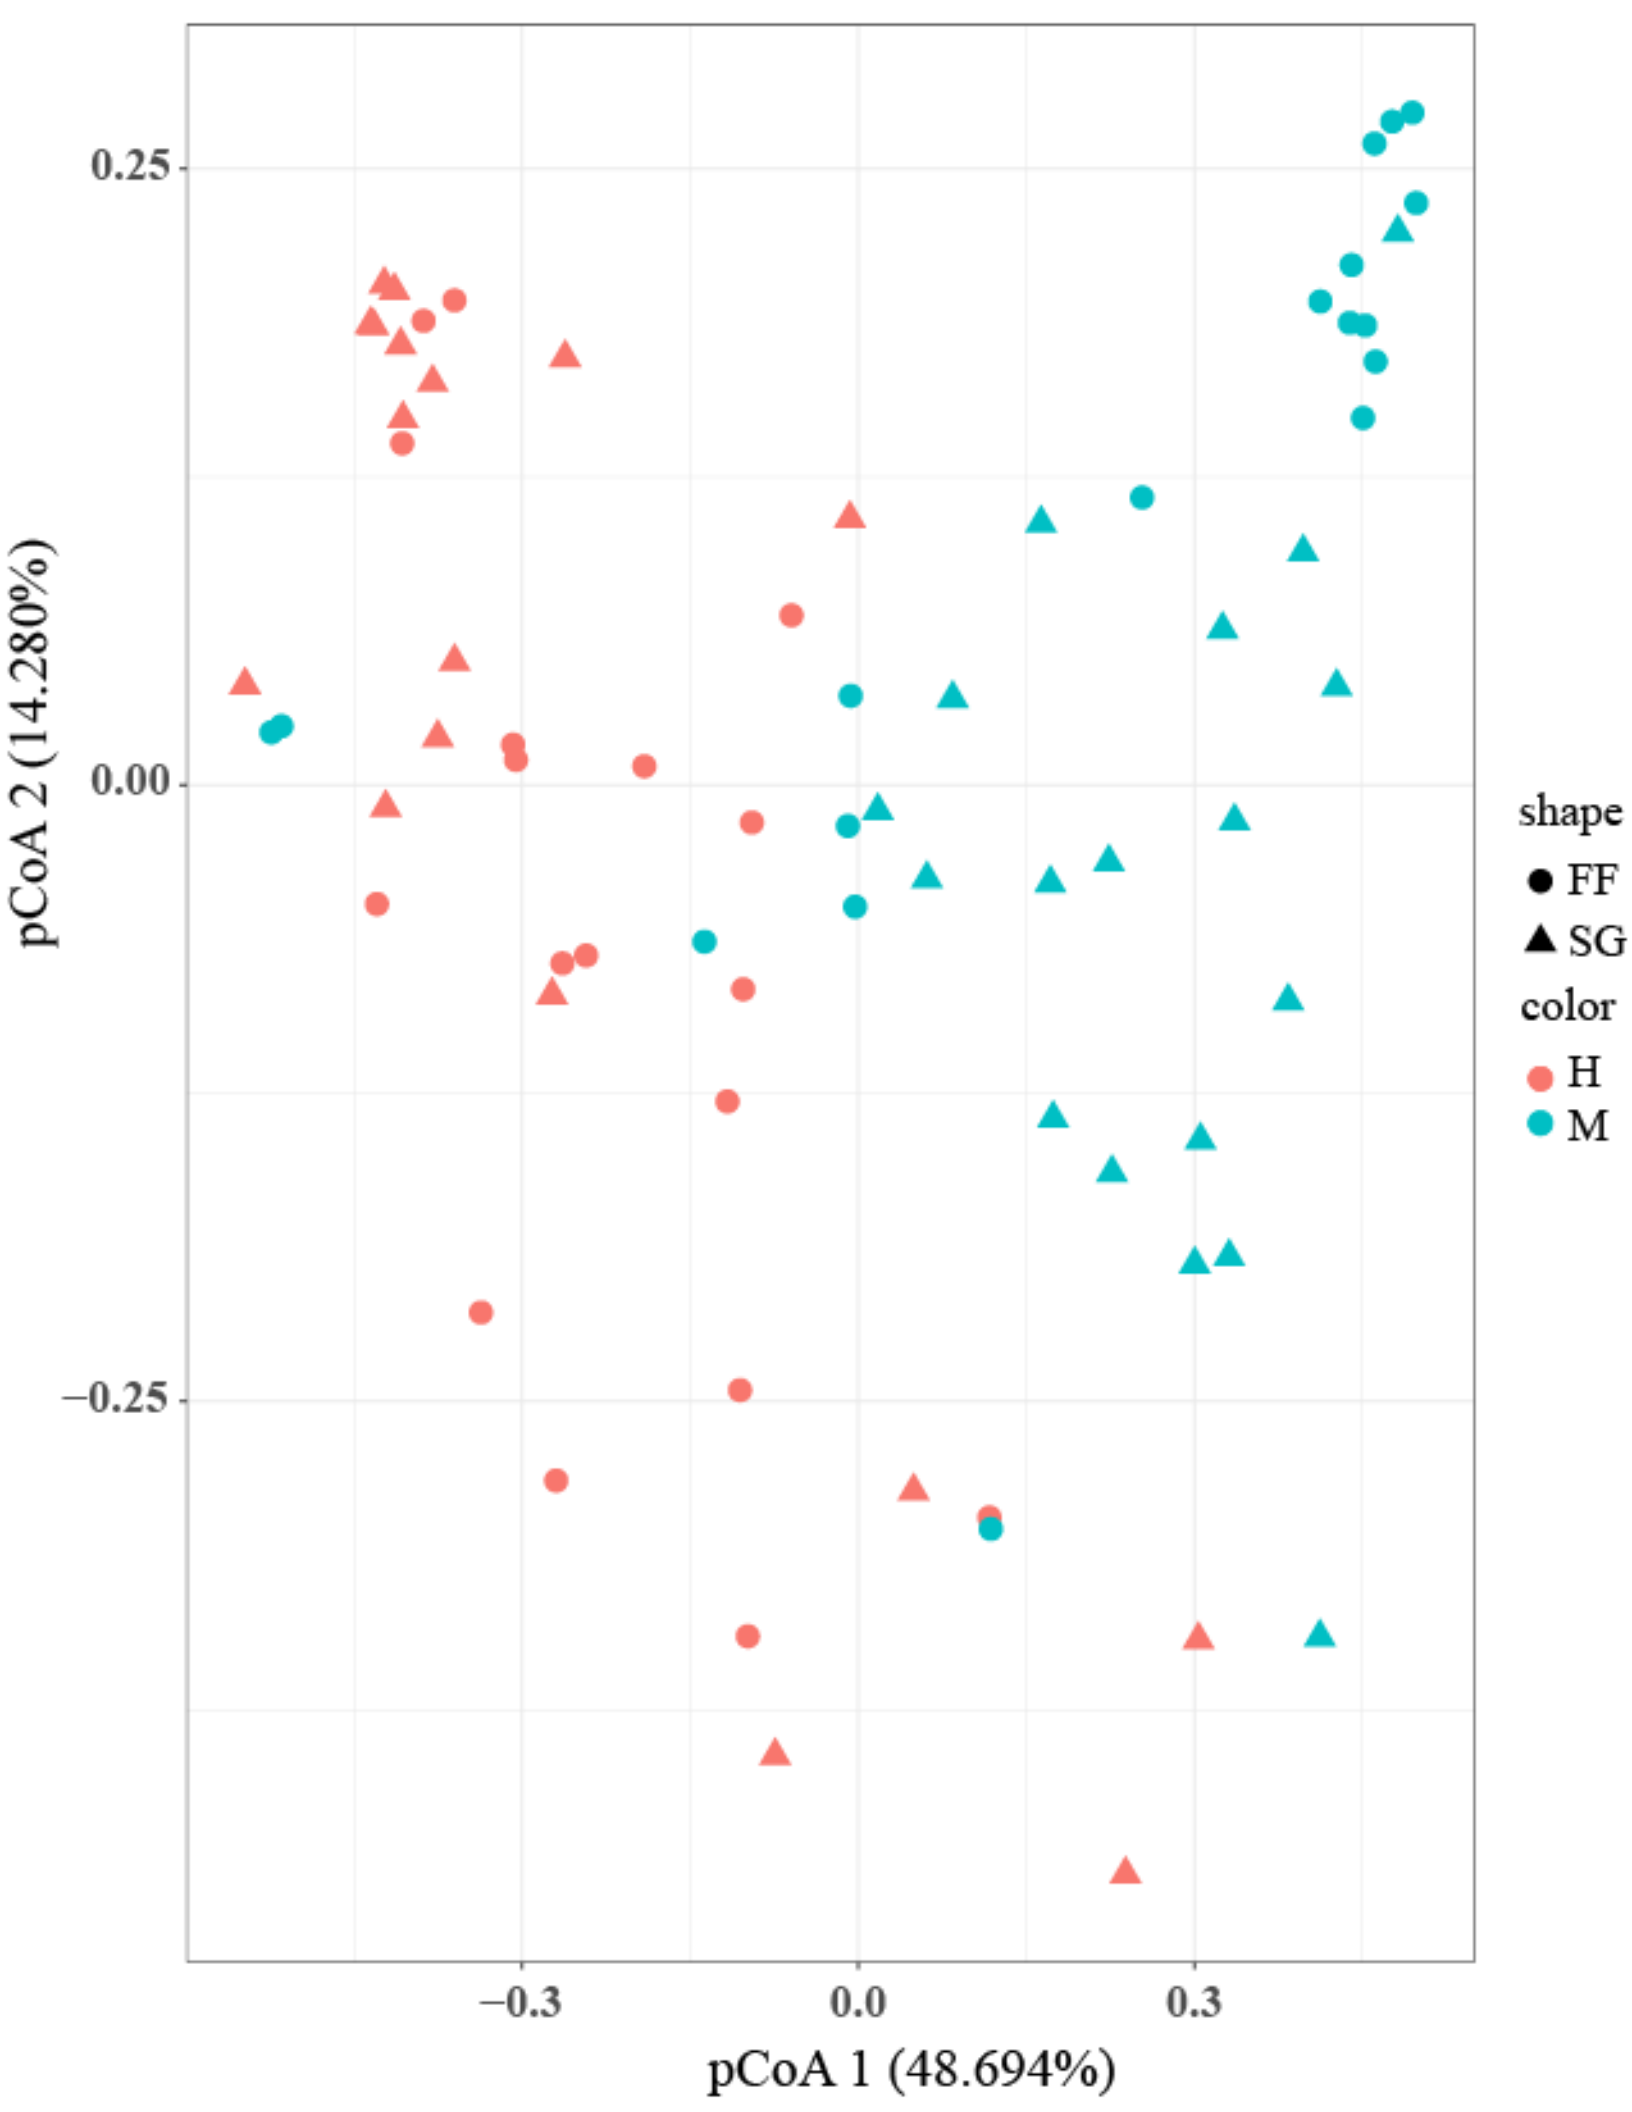

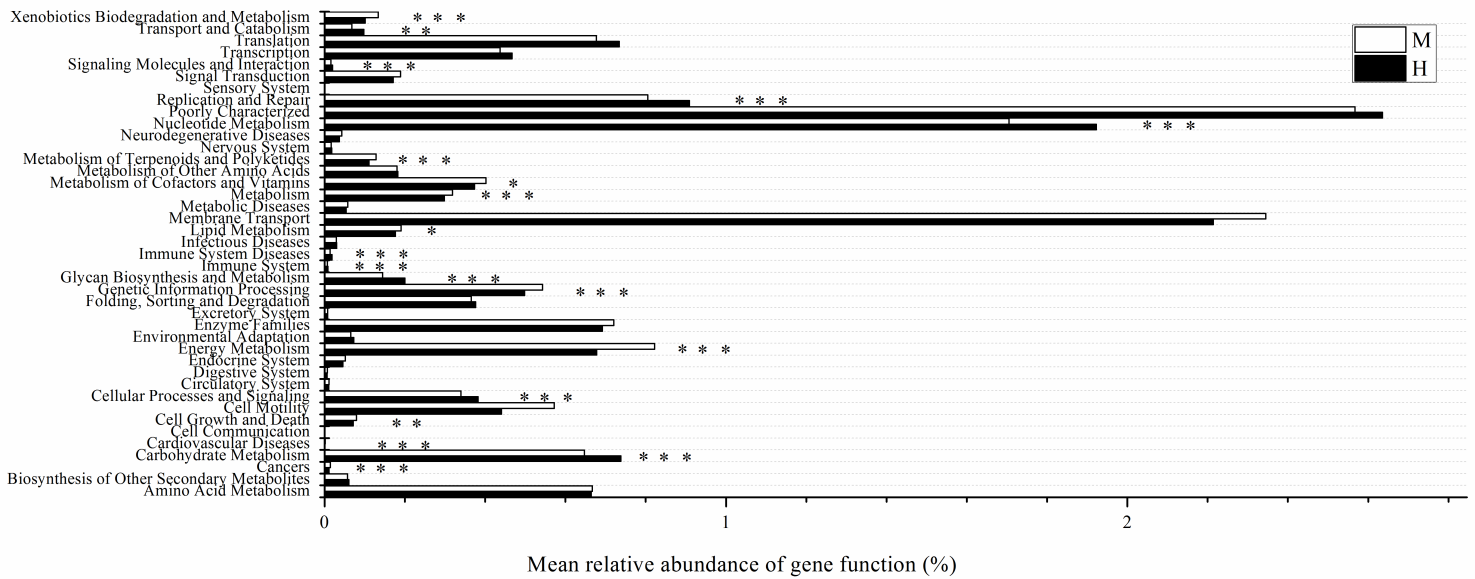

Source: http://biorxiv.org/content/10.1101/356030v1.full.pdf
